# Supplementary material
Source: publisher site journal article supplement (https://thieme-connect.com/media/10.1055-s-00035024/201702/supmat/10-1160-th16-07-0518-supp.pdf)

## Supplementary Material to Schooling, Zhong: “Plasma levels of the anti-coagulation protein C and the risk of ischaemic heart disease. A Mendelian randomisation study“ (Thromb Haemost 2017; 117.2)

Suppl. Table 1: Associations per µg/mL protein C with CAD/MI, CAD, MI, diabetes, lipids, blood pressure, glycemic traits, adiposity, cognition and major depressive disorder, obtained from separate sample instrumental variable analysis using 3 and 6 genetic determinants of protein C [20, 34–36] applied to CARDIoGRAMplusC4D [23, 24], CARDIoGRAMplusC4D 1000 Genomes [25], DIAGRAM [27], the Global Lipids Genetics Consortium Results [26] GIANT [28, 29], SSGAC [30] and PGC [31] using a weighted median estimator

|                               |                               | 3 SNPs<br>(rs867186, rs3746429,<br>rs7580658) |                      | 6 SNPs<br>(rs867186, rs3746429, rs7580658,<br>rs1260326, rs4321325, rs17145713) |                     |
|-------------------------------|-------------------------------|-----------------------------------------------|----------------------|---------------------------------------------------------------------------------|---------------------|
|                               |                               | OR                                            | 95 % CI              | OR                                                                              | 95 % CI             |
| <b>Cardiovascular disease</b> | CAD/MI                        | <b>0.85</b>                                   | <b>0.80 to 0.90</b>  | <b>0.86</b>                                                                     | <b>0.82 to 0.91</b> |
|                               | CAD 1000G                     | <b>0.87</b>                                   | <b>0.82 to 0.92</b>  | <b>0.88</b>                                                                     | <b>0.83 to 0.93</b> |
|                               | MI 1000G                      | <b>0.86</b>                                   | <b>0.81 to 0.92</b>  | <b>0.88</b>                                                                     | <b>0.82 to 0.93</b> |
| <b>Diabetes</b>               |                               | 1.08                                          | 0.95 to 1.21         | 1.05                                                                            | 0.93 to 1.17        |
| <b>Lipids</b>                 |                               | $\beta$                                       | 95 % CI              | $\beta$                                                                         | 95 % CI             |
|                               | LDL-cholesterol (effect size) | -0.01                                         | -0.03 to 0.02        | 0.01                                                                            | -0.02 to 0.03       |
|                               | HDL-cholesterol (effect size) | -0.01                                         | -0.03 to 0.02        | -0.01                                                                           | -0.04 to 0.01       |
|                               | Triglycerides (effect size)   | 0.01                                          | -0.02 to 0.03        | 0.01                                                                            | -0.02 to 0.03       |
| <b>Adiposity</b>              | BMI men (effect size)         | <b>0.03</b>                                   | <b>0.001 to 0.06</b> | 0.03                                                                            | -0.01 to 0.06       |
|                               | BMI women (effect size)       | -0.03                                         | -0.06 to 0.001       | -0.03                                                                           | -0.06 to 0.001      |
|                               | WHR men (effect size)         | -0.01                                         | -0.04 to 0.02        | -0.01                                                                           | -0.04 to 0.02       |
|                               | WHR women (effect size)       | 0.03                                          | -0.01 to 0.05        | 0.03                                                                            | 0.01 to 0.06        |
| <b>Other</b>                  | Cognition z-score             | 0.01                                          | -0.01 to 0.03        | 0.01                                                                            | -0.01 to 0.03       |
|                               |                               | OR                                            | 95 % CI              | OR                                                                              | 95 % CI             |
|                               | Major depressive disorder(OR) | 0.99                                          | 0.87 to 1.14         | 0.97                                                                            | 0.85 to 1.10        |

Suppl. Figure 1: SNP specific and total associations per  $\mu\text{g}/\text{mL}$  of protein C with a) low-density lipoprotein (LDL) cholesterol (inverse normal transformed effect size), b) high-density lipoprotein (HDL) cholesterol (inverse normal transformed effect size), c) triglycerides (inverse normal transformed effect size) and d) diabetes, obtained from separate sample instrumental variable analysis using 6 genetic determinants of protein C [20, 34–36] applied to the Global Lipids Genetics Consortium Results [26] and DIAGRAM [27]

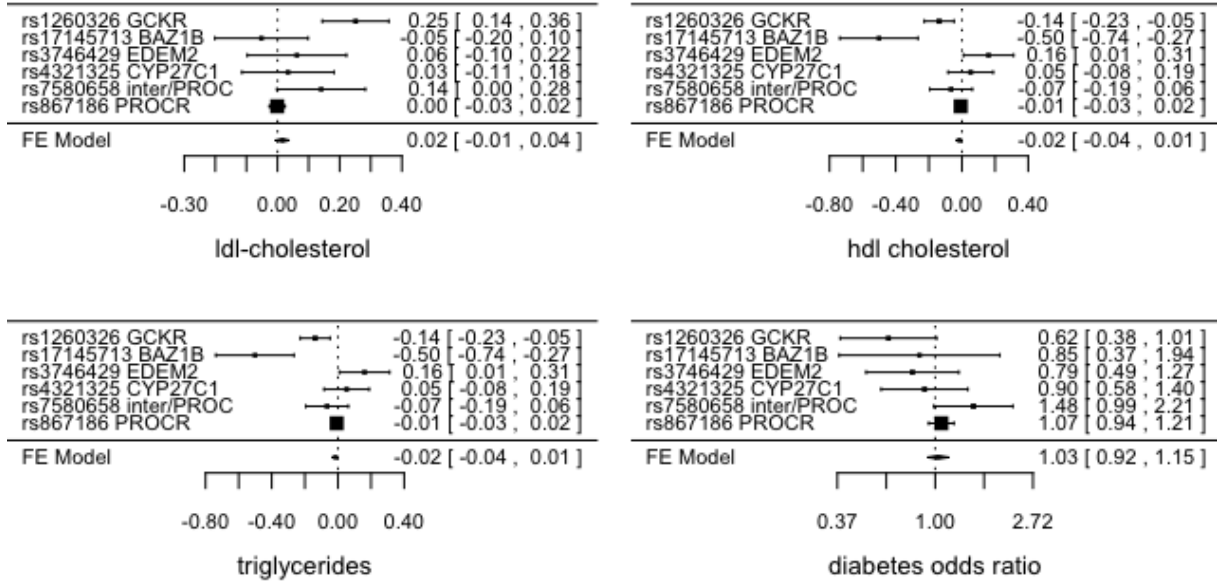

Suppl. Figure 2: Associations per  $\mu\text{g}/\text{mL}$  protein C by SNP and overall with a) CAD/MI, b) CAD and c) MI, obtained from separate sample instrumental variable analysis using 6 genetic determinants of protein C [20, 34–36] applied to CARDIoGRAMplusC4D [23, 24], and CARDIoGRAMplusC4D 1000 Genomes [25]

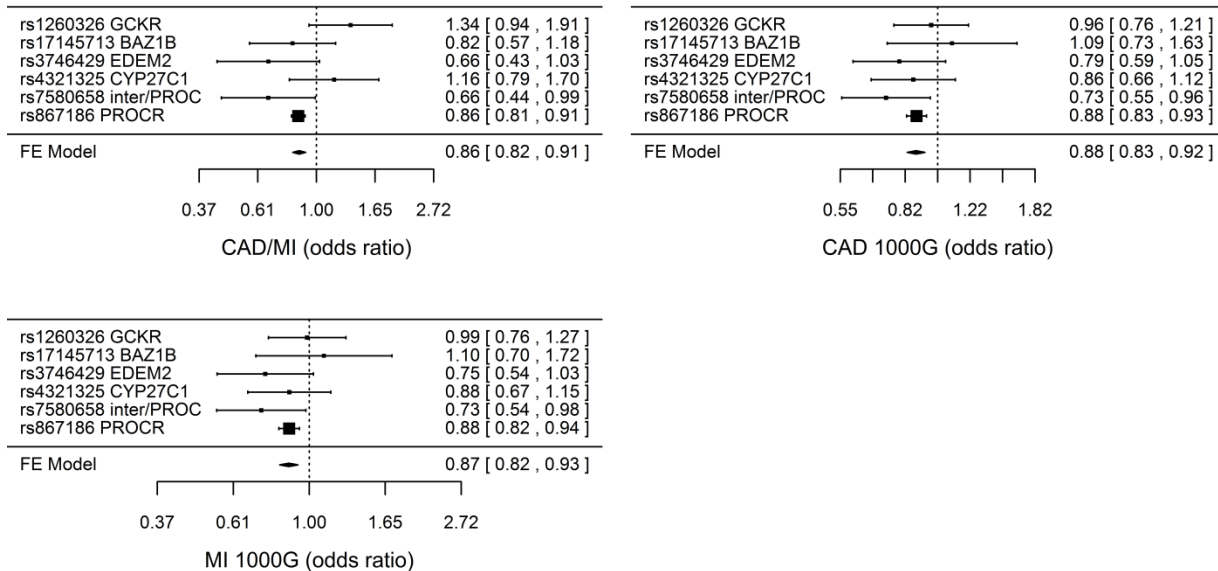

Suppl. Figure 3: Associations per  $\mu\text{g}/\text{mL}$  protein C by SNP and overall with a) body mass index (BMI) in men (inverse normal standard transformed), b) BMI in women (inverse normal standard transformed) c) waist-hip ratio (WHR) in men (inverse normal standard transformed, d) WHR in women (inverse normal standard transformed, e) cognition (z-score) and f) major depressive disorder, obtained from separate sample instrumental variable analysis using 6 genetic determinants of protein C [20, 34–36] applied to GIANT [28, 29], SSGAC [30] and PGC [31].

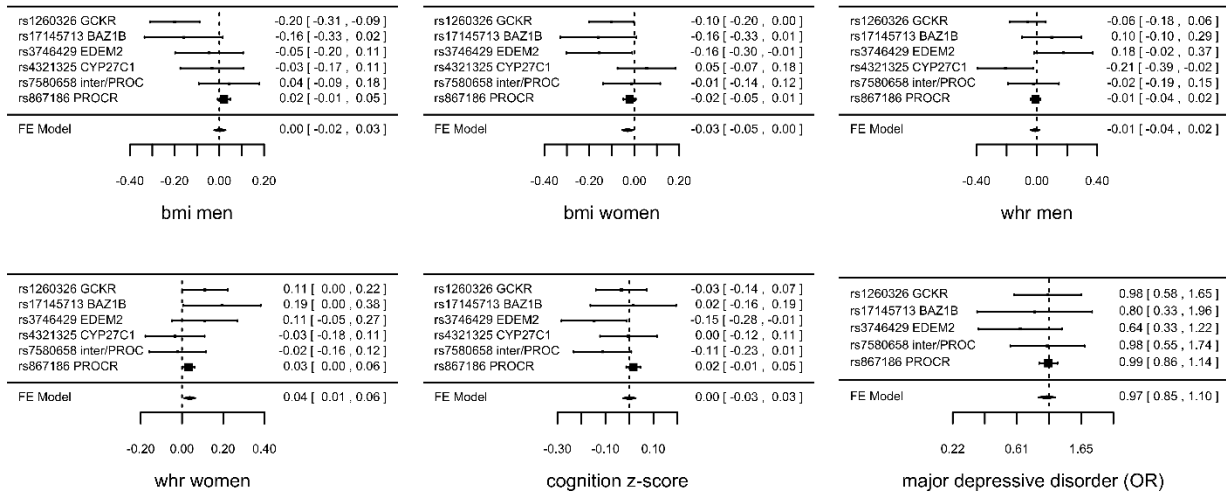

Supplement: Supplementary file 1 [file 10-1160-th16-07-0518-supp.pdf]
